# Supplementary material for: Diapause is associated with a change in the polarity of secretion of insulin-like peptides
Source: PubMed Central journal article supplement (PMC4742890; doi:10.1038/ncomms10573), 2016-02-03
Supplement: ncomms10573-s1.pdf [file ncomms10573-s1.pdf]

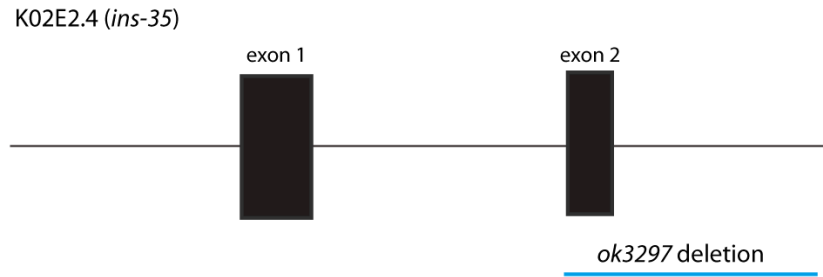

----- atttaagtccaaattttcca ----- aaattggaaatttccggcaa --- wild-type  
 ----- atttaagtccaaattttcca [664 bp deletion] aaattggaaatttccggcaa --- ok3297

**Supplementary Figure 1 | Location of deletion in *ins-35(ok3297)*.** Black boxes represent exons in *ins-35*. The blue line indicates the *ins-35(ok3297)* deletion site. Sequencing revealed the indicated break point for *ins-35(ok3297)*.

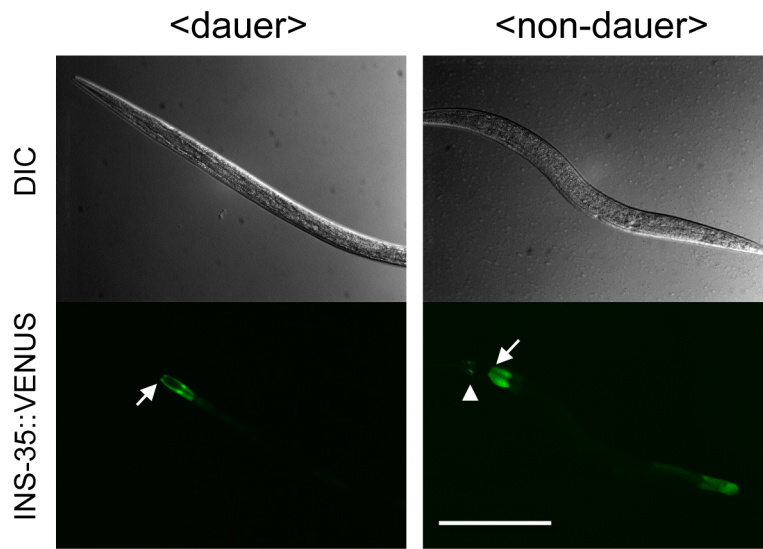

**Supplementary Figure 2 | Expression patterns of transgenic worms expressing *ins-35p::VENUS*.** Localization of *ins-35p::VENUS* at L2-L3 (non-dauer) (right) and the day 1 dauer (left) stages. Arrows indicate the intestinal valves. Arrowhead indicates head neuron. The scale bar is 100  $\mu$ m.

Overexpression (*ins-35* genome)

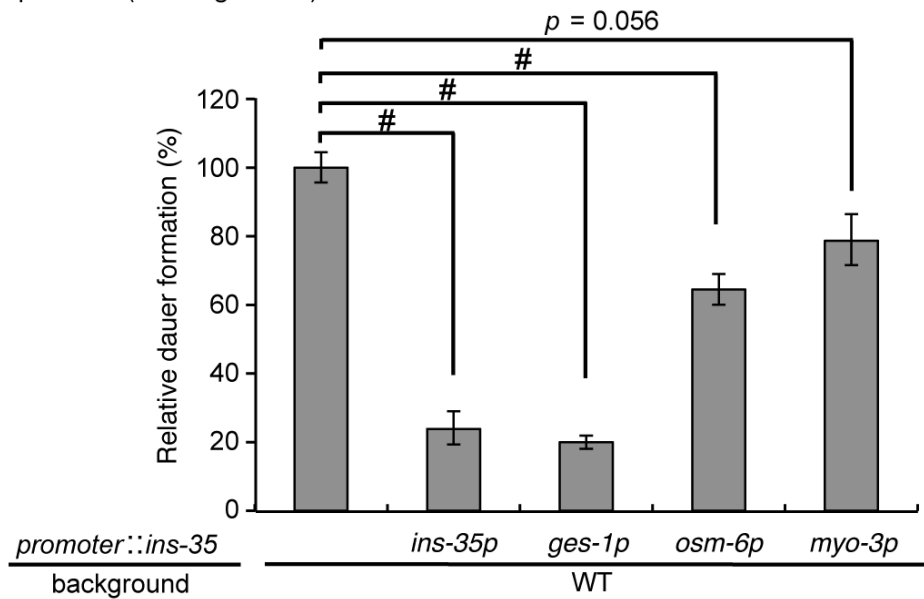

**Supplementary Figure 3 | Relative percentages of dauer formation in each *ins-35* mutant in the presence of dauer inducing-pheromone, compared with wild-type animals (overexpression experiment).** Data are expressed as the mean  $\pm$  S.E. #  $p < 0.05$ ; N.S.: Not Significant. Error bars are defined as s.e.m.. Multiple comparisons between groups were made using Dunnett's test. Detailed parameters including numbers, trials,  $p$ -values, and values of mean  $\pm$  S.E. are shown in Supplementary Table 2.

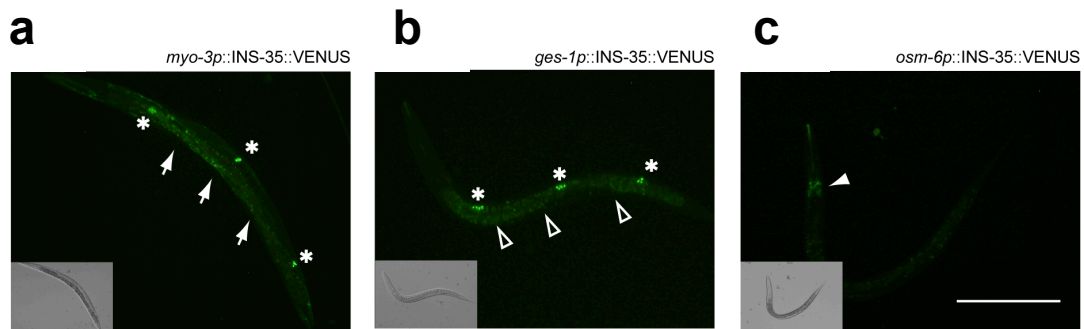

**Supplementary Figure 4 | Expression patterns of INS-35::VENUS driven by tissue-specific promoters at the L2 stage.** Expression patterns of *myo-3p::INS-35::VENUS* (a), *ges-1p::INS-35::VENUS* (b) and *osm-6p::INS-35::VENUS* (c) are shown. Arrows indicate muscle cells. Hollow arrowheads indicate intestinal cells. The solid arrowhead indicates amphid neurons. Asterisks indicate coelomocytes. The DIC images are shown on the bottom left. The scale bar is 25  $\mu\text{m}$ .



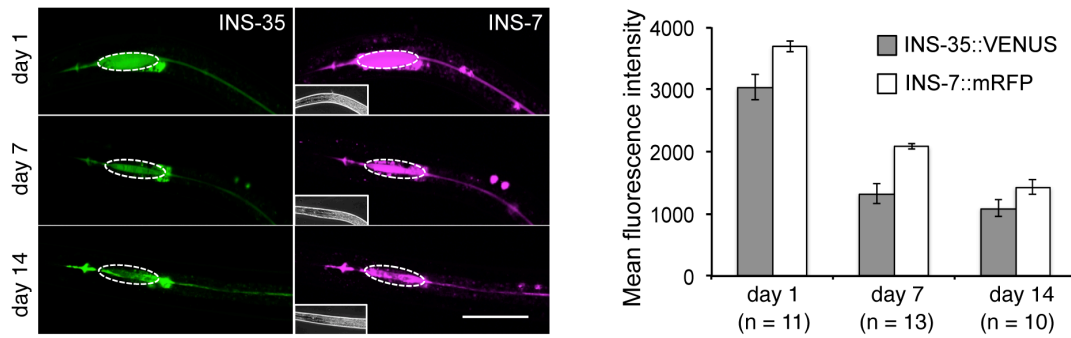

**Supplementary Figure 5 | Fluorescence intensities of INS-35::VENUS and INS-7::mRFP at day 1, day 7 and day 14 dauers.** The mean fluorescence intensities of INS-35::VENUS driven by the *ins-35* promoter and INS-7::mRFP driven by the *ins-7* promoter were calculated within the dashed ellipsoidal areas. Each box represents the intensity of INS-35::VENUS (gray) and INS-7::mRFP (white). Scale bar, 50  $\mu$ m. Data are expressed as the mean  $\pm$  S.E. Error bars are defined as s.e.m..

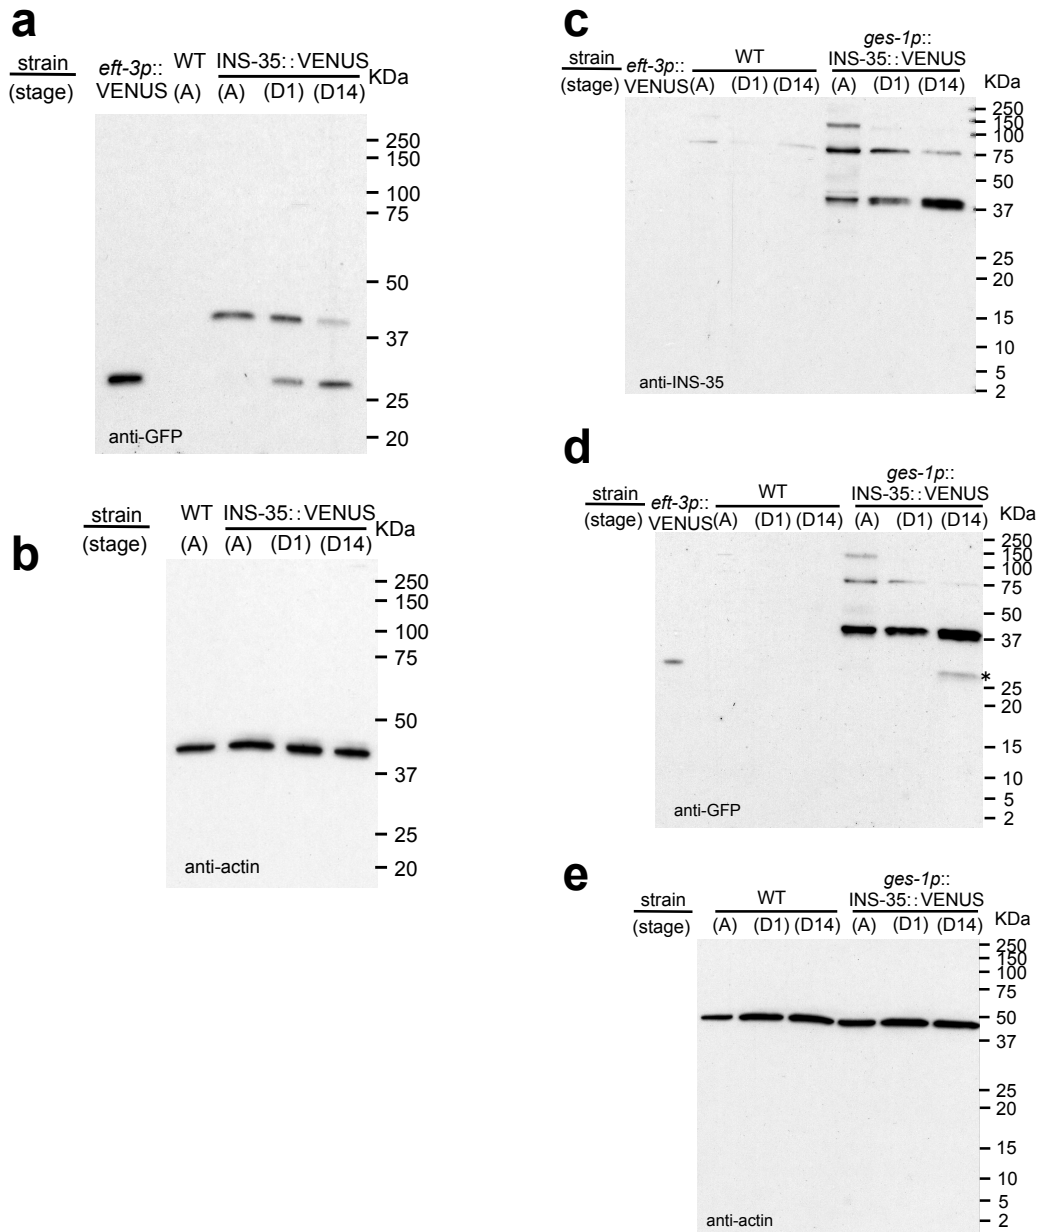

**Supplementary Figure 6 | Western blot analysis of extractions of *ins-35p::ins-35::venus* (a and b) or *ges-1p::ins-35::venus* (c, d, and e) expressing worms. Asterisk indicates a band of approximately 31 kDa in the lane corresponding to individuals at day 14 of dauer arrest. A, adult stage; D1, dauer stage at day 1; D14, dauer stage at day 14.**

**a** *ges-1p::VENUS*

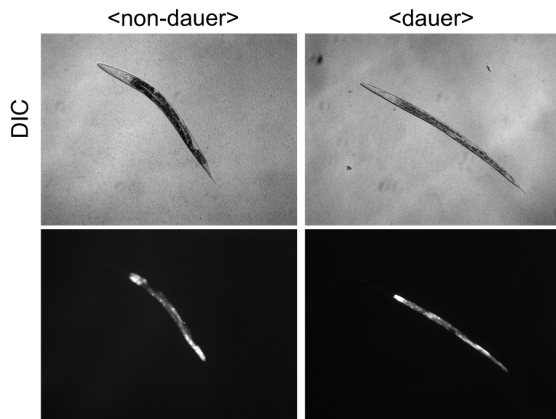

**b** *ins-35p::VENUS*

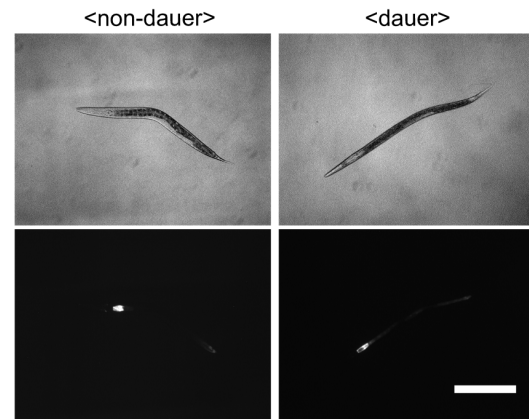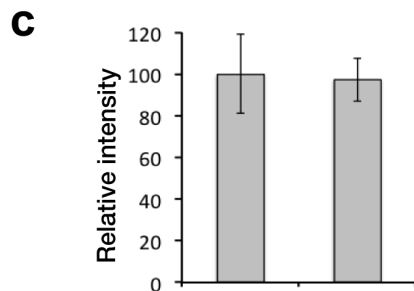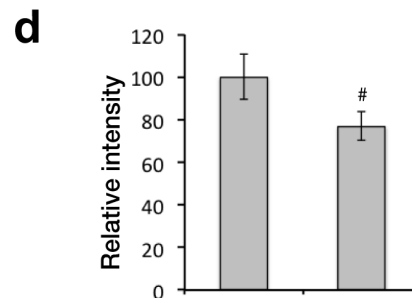

**Supplementary Figure 7 | Fluorescent intensity of *ins-35p::VENUS* is decreased in the day 1 dauer stage.** (a and b) Panels show DIC and fluorescence images of *ges-1p::VENUS* (a) and *ins-35p::VENUS* (b) expressing worms at non-dauer (L2-3) and day 1 dauer stages. Scale bar is 100  $\mu$ m. (c and d) Relative intensity of *ges-1p::VENUS* (c) and *ins-35p::VENUS* (d) in the worms. Data are expressed as the mean  $\pm$  S.E. #  $p < 0.05$ .  $n=10$ . Error bars are defined as s.e.m.. Trials=1. Comparisons between two groups were made using Student's *t*-test.

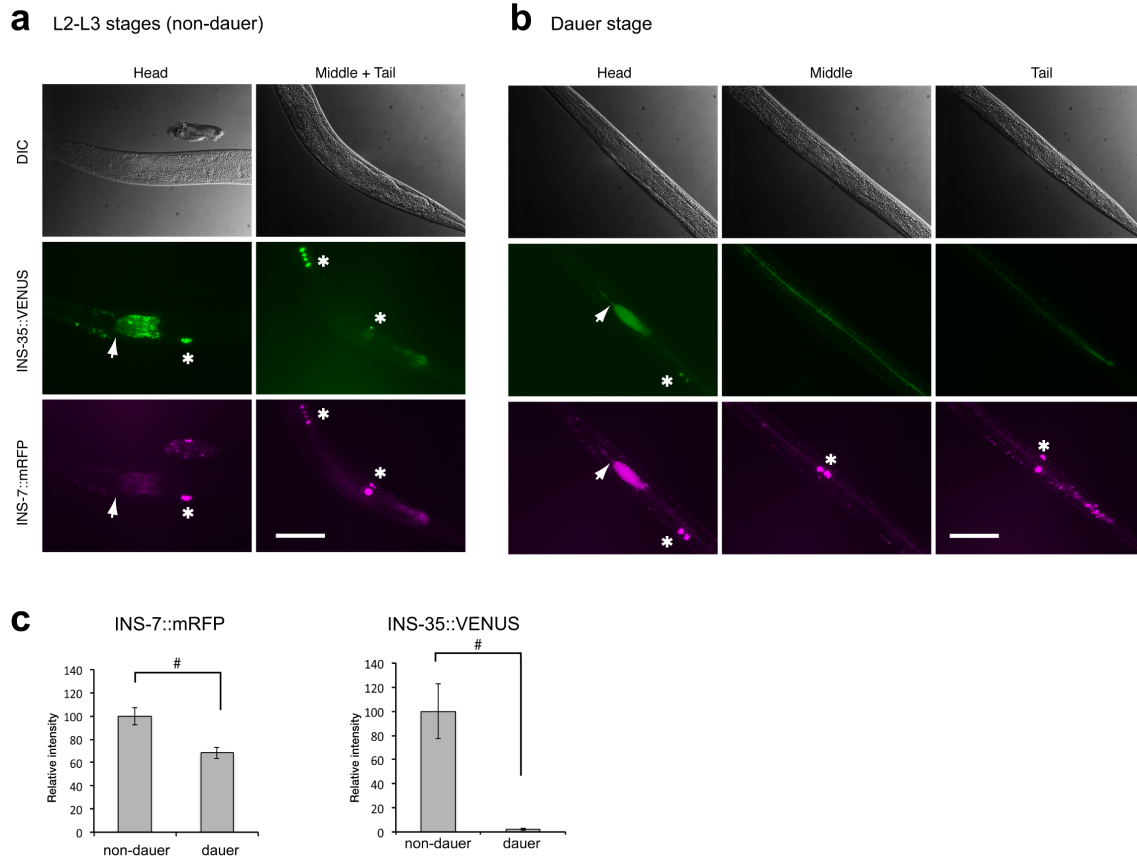

**Supplementary Figure 8 | Comparison of fluorescence intensity in coelomocytes between L2-L3 (non-dauer) and the day 1 dauer stages.** Localization of INS-35::VENUS driven by the *ins-35* promoter and INS-7::mRFP driven by the *ins-7* promoter at (a) L2-L3 (non-dauer) and (b) the day 1 dauer stages. Arrows indicate the intestinal valves. Asterisks indicate coelomocytes. The scale bar is 50  $\mu$ m. (c) Relative intensity of INS-7::mRFP and INS-35::VENUS in coelomocytes. Data are expressed as the mean  $\pm$  S.E. #  $p < 0.05$ .  $n=10$ . Error bars are defined as s.e.m.. Trials=1. Comparisons between two groups were made using Student's *t*-test.

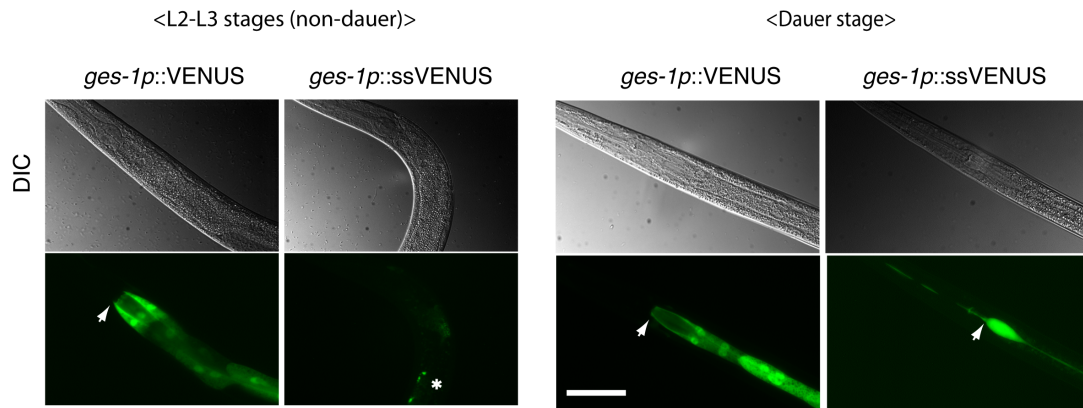

**Supplementary Figure 9 | Localization of *ges-1p::VENUS* and *ges-1p::ssVENUS* at L2-L3 (non-dauer) and the day 1 dauer stages.** In the *ges-1p::venus* expressing worms, VENUS signal in coelomocytes was not detected at non-dauer or the dauer stages. *ssVENUS* was detected in coelomocytes at L2-L3 (non-dauer) stages and accumulated in the intestinal canal at the day 1 dauer stage. Arrows indicate the intestinal valves. The asterisk indicates a pair of coelomocytes. The scale bar is 50  $\mu\text{m}$ .

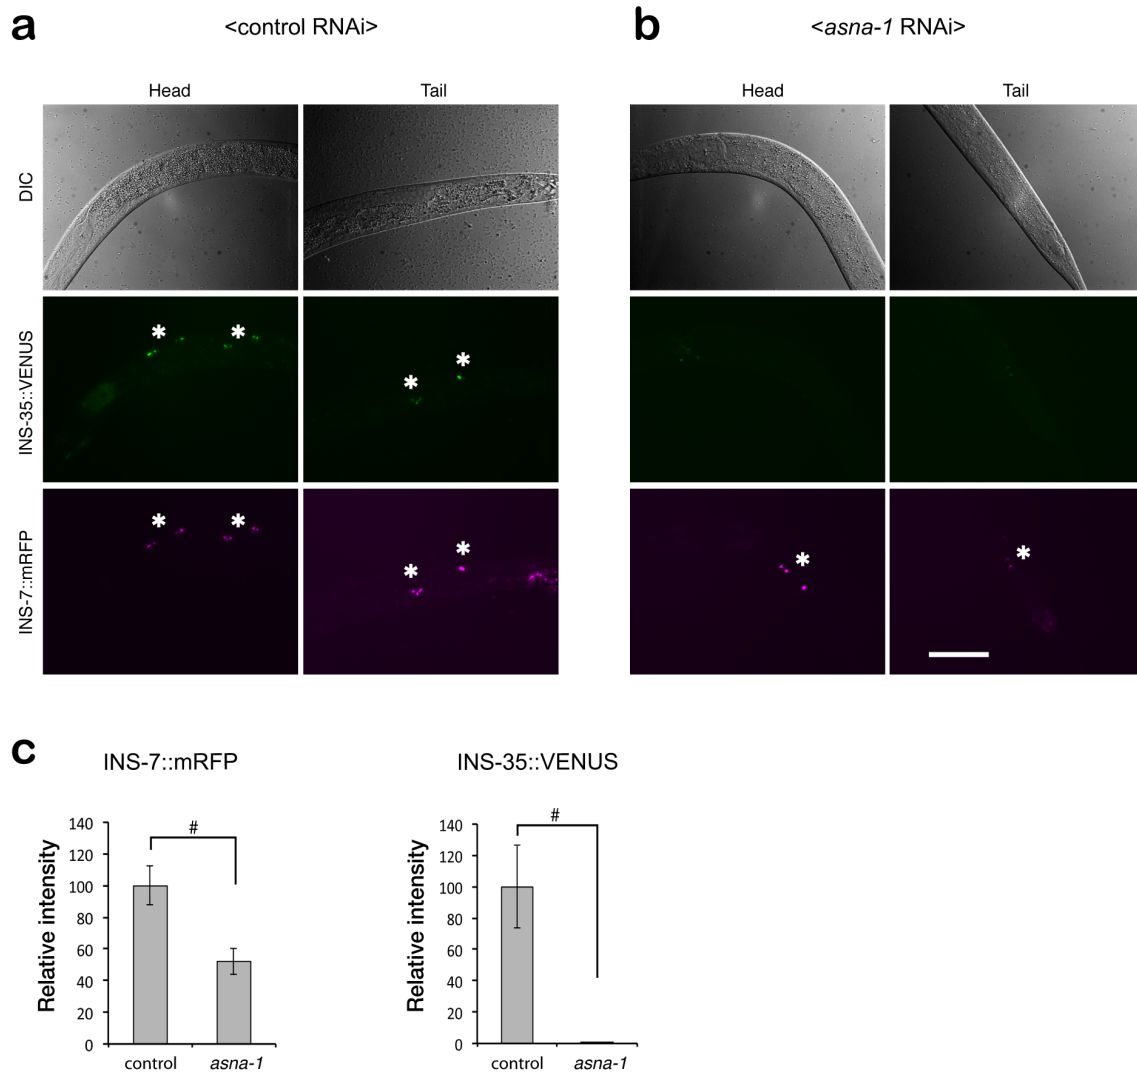

**Supplementary Figure 10 | *asna-1* RNAi decreases fluorescent intensities of INS-35::VENUS and INS-7::mRFP in coelomocytes at L2-L3 stages (non-dauer).** Localization of INS-35::VENUS driven by the *ins-35* promoter and INS-7::mRFP driven by the *ins-7* promoter under control RNAi (a) and *asna-1* RNAi (b) conditions. Asterisks indicate coelomocytes. The scale bar is 50  $\mu$ m. (c) Relative intensity of INS-7::mRFP and INS-35::VENUS in coelomocytes. Data are expressed as the mean  $\pm$  S.E. #  $p < 0.05$ .  $n=10$ . Error bars are defined as s.e.m.. Trials=1. Comparisons between two groups were made using Student's *t*-test.

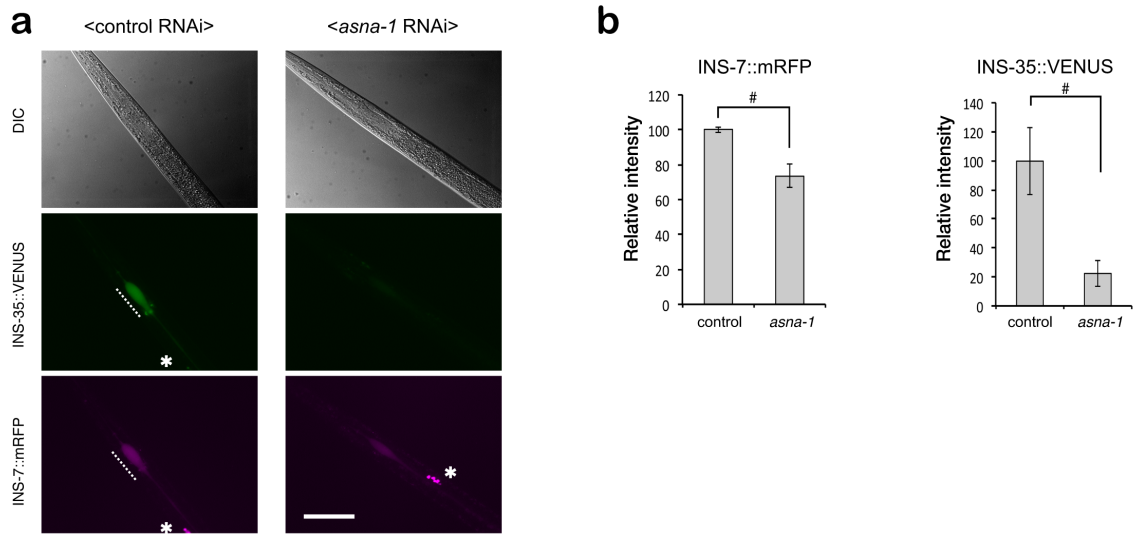

**Supplementary Figure 11 | *asna-1* RNAi decreases fluorescent intensities of INS-35::VENUS and INS-7::mRFP in the intestinal lumen at the day 1 dauer stage.**

(a) Localization of INS-35::VENUS driven by the *ins-35* promoter and INS-7::mRFP driven by the *ins-7* promoter under control RNAi (Left) and *asna-1* RNAi (right). Asterisks indicate coelomocytes. Dashed lines indicate anterior intestinal lumens. The scale bar is 50  $\mu$ m. (b) Relative intensity of INS-7::mRFP and INS-35::VENUS in the anterior intestinal lumen. Data are expressed as the mean  $\pm$  S.E. #  $p < 0.05$ .  $n=10$ . Error bars are defined as s.e.m.. Trials=1. Comparisons between two groups were made using Student's *t*-test.

Supplementary Table 1 | Relative dauer formation of *ins*-RNAi treated animals

| Target gene   | Relative dauer formation (%) | Number |           |                | <i>p</i> value |
|---------------|------------------------------|--------|-----------|----------------|----------------|
|               |                              | dauer  | non-dauer | total (trials) |                |
| control       | 100.0 ± 10.2                 | 893    | 813       | 1706 (7)       | control        |
| <i>ins-20</i> | 91.7 ± 22.1                  | 250    | 306       | 556 (2)        | 0.999          |
| <i>ins-21</i> | 105.1 ± 8.9                  | 378    | 427       | 805 (4)        | 1.000          |
| <i>ins-22</i> | 83.8 ± 21.0                  | 315    | 411       | 726 (4)        | 0.976          |
| <i>ins-23</i> | 83.6 ± 20.7                  | 354    | 589       | 943 (4)        | 0.677          |
| <i>ins-24</i> | 102.0 ± 16.0                 | 250    | 169       | 419 (2)        | 0.999          |
| <i>ins-25</i> | 132.2 ± 4.7                  | 101    | 114       | 215 (1)        | 1.000          |
| <i>ins-27</i> | 121.6 ± 11.0                 | 401    | 293       | 694 (3)        | 0.999          |
| <i>ins-28</i> | 122.6 ± 3.9                  | 268    | 182       | 450 (2)        | 0.996          |
| <i>ins-29</i> | 102.4 ± 9.4                  | 286    | 333       | 619 (3)        | 0.999          |
| <i>ins-30</i> | 96.6 ± 19.1                  | 148    | 293       | 441 (2)        | 0.606          |
| <i>ins-31</i> | 112.2 ± 10.7                 | 270    | 162       | 432 (2)        | 0.998          |
| <i>ins-33</i> | 139.0 ± 9.6                  | 388    | 174       | 562 (2)        | 0.450          |
| <i>ins-34</i> | 79.1 ± 21.1                  | 402    | 306       | 708 (2)        | 1.000          |
| <i>ins-35</i> | 140.4 ± 6.5                  | 502    | 143       | 645 (3)        | 0.022          |
| <i>ins-36</i> | 89.5 ± 5.5                   | 115    | 88        | 203 (1)        | 1.000          |

Relative percentages of dauer formation in each *ins*-RNAi treated animals compared with control RNAi treated animals are shown. Data are expressed as the mean ± S.E.. For the dauer formation assays, 3-4 independent plates were assayed as 1 trial. Multiple comparisons between groups were made using Dunnett's test.



Supplementary Table 2 | Summary of the relative dauer formation

| Background             | Transgene (Conc.)                      | Relative dauer formation (%) | dauer | non-dauer | total (trials) | p value |
|------------------------|----------------------------------------|------------------------------|-------|-----------|----------------|---------|
| Figure 1c              |                                        |                              |       |           |                |         |
| Wild type              |                                        | 100.0 ± 3.7                  | 85    | 234       | 319 (2)        | control |
| <i>ins-35(ok3297)</i>  |                                        | 327.1 ± 3.7                  | 285   | 41        | 326 (2)        | <.001   |
| <i>ins-35(ok3297)</i>  | <i>ins-35p::ins-35</i> cDNA (15 ng/μl) | 64.1 ± 6.9                   | 27    | 130       | 157 (2)        | 0.031   |
| <i>ins-35(ok3297)</i>  | <i>ges-1p::ins-35</i> cDNA (15 ng/μl)  | 9.0 ± 2.5                    | 7     | 180       | 187 (2)        | <.001   |
| <i>ins-35(ok3297)</i>  | <i>osm-6p::ins-35</i> cDNA (15 ng/μl)  | 127.6 ± 5.7                  | 60    | 116       | 176 (2)        | 0.135   |
| <i>ins-35(ok3297)</i>  | <i>myo-3p::ins-35</i> cDNA (15 ng/μl)  | 55.1 ± 9.5                   | 56    | 139       | 195 (2)        | 0.005   |
| Supplementary Figure 2 |                                        |                              |       |           |                |         |
| Wild type              |                                        | 100.0 ± 4.5                  | 105   | 169       | 274 (2)        | control |
| Wild type              | <i>ins-35p::ins-35</i> (15 ng/μl)      | 24.1 ± 4.8                   | 32    | 308       | 341 (2)        | <.001   |
| Wild type              | <i>ges-1p::ins-35</i> (15 ng/μl)       | 20.0 ± 1.8                   | 23    | 263       | 286 (2)        | <.001   |
| Wild type              | <i>osm-6p::ins-35</i> (15 ng/μl)       | 64.5 ± 4.4                   | 81    | 246       | 327 (2)        | <.001   |
| Wild type              | <i>myo-3p::ins-35</i> (15 ng/μl)       | 78.9 ± 7.6                   | 96    | 227       | 323 (2)        | 0.056   |
| Figure 3a              |                                        |                              |       |           |                |         |
| Wild type              |                                        | 100.0 ± 7.3                  | 42    | 263       | 305 (3)        | control |
| <i>ins-6(tm2416)</i>   |                                        | 95.1 ± 6.2                   | 35    | 236       | 271 (3)        | 0.994   |
| <i>ins-7(tm1907)</i>   |                                        | 243.2 ± 15.3                 | 104   | 211       | 315 (3)        | <.001   |
| <i>ins-35(ok3297)</i>  |                                        | 645.7 ± 15.7                 | 209   | 30        | 239 (3)        | <.001   |
| <i>daf-28(tm2308)</i>  |                                        | 620.1 ± 8.6                  | 323   | 61        | 384 (3)        | <.001   |
| Figure 3c              |                                        |                              |       |           |                |         |
| Wild type              |                                        | 100.0 ± 5.0                  | 172   | 263       | 435 (2)        | <.001   |
| <i>ins-7(tm1907)</i>   |                                        | 166.5 ± 4.4                  | 402   | 216       | 618 (2)        | control |
| <i>ins-7(tm1907)</i>   | <i>ins-35p::ins-35</i> (25 ng/μl)      | 11.5 ± 3.1                   | 17    | 298       | 315 (2)        | <.001   |
| <i>ins-7(tm1907)</i>   | <i>ins-35p::ins-35</i> (15 ng/μl)      | 29.2 ± 3.2                   | 46    | 349       | 395 (2)        | <.001   |
| <i>ins-7(tm1907)</i>   | <i>ins-35p::ins-35</i> ( 5 ng/μl)      | 77.4 ± 4.7                   | 106   | 230       | 336 (2)        | <.001   |
| Wild type              |                                        | 100.0 ± 8.2                  | 87    | 420       | 507 (2)        | <.001   |
| <i>ins-35(ok3297)</i>  |                                        | 447.1 ± 7.6                  | 377   | 123       | 500 (2)        | control |
| <i>ins-35(ok3297)</i>  | <i>ins-7p::ins-7</i> (25 ng/μl)        | 200.8 ± 8.8                  | 137   | 271       | 408 (2)        | 0.022   |
| <i>ins-35(ok3297)</i>  | <i>ins-7p::ins-7</i> (15 ng/μl)        | 288.4 ± 8.4                  | 212   | 222       | 434 (2)        | <.001   |
| <i>ins-35(ok3297)</i>  | <i>ins-7p::ins-7</i> ( 5 ng/μl)        | 404.3 ± 12.8                 | 265   | 126       | 391 (2)        | <.001   |
| Figure 4a              |                                        |                              |       |           |                |         |
| Wild type              |                                        | 100.0 ± 20.2                 | 55    | 238       | 293 (3)        | <.001   |
| <i>ins-35(ok3297)</i>  |                                        | 428.8 ± 4.0                  | 169   | 41        | 210 (3)        | 0.034   |
| <i>ins-7(tm1907)</i>   |                                        | 178.4 ± 27.8                 | 82    | 164       | 246 (3)        | <.001   |
| <i>ins-7; ins-35</i>   |                                        | 493.8 ± 13.7                 | 229   | 13        | 242 (3)        | control |

Data are expressed as the mean ± S.E.. For the dauer formation assays, 3-4 independent plates were assayed as 1 trial. Multiple comparisons between groups were made using Dunnett's test.

Supplementary Table 3 | Summary of the recovery ratio

| Background            | Recovery ratio (%) | Number |           |                | <i>p</i> value |
|-----------------------|--------------------|--------|-----------|----------------|----------------|
|                       |                    | dauer  | non-dauer | total (trials) |                |
| Wild type             | 100.0 ± 3.9        | 104    | 460       | 564 (2)        | <.001          |
| <i>ins-35(ok3297)</i> | 77.6 ± 3.3         | 138    | 393       | 531 (2)        | 0.029          |
| <i>ins-7(tm1907)</i>  | 87.7 ± 1.0         | 203    | 269       | 472 (2)        | 0.002          |
| <i>ins-7; ins-35</i>  | 60.3 ± 5.4         | 236    | 233       | 469 (2)        | control        |

Data are expressed as the mean ± S.E.. For the dauer exit assays, 3 independent plates were assayed as 1 trial. Multiple comparisons between groups were made using Dunnett's test.

**Supplementary Table 4 | PCR primers used in this study**

| primer name                                  | sequence 5' to 3'                                           |                                        |
|----------------------------------------------|-------------------------------------------------------------|----------------------------------------|
|                                              | Fw                                                          | Rv                                     |
| <i>ins-35(ok3297)</i>                        | gattctcatggaaggatgtg                                        | aagttcactgagcattcagg                   |
| <i>ins-35p::ins-35</i>                       | ataggtaccagttcacggtatcaatgag                                | taagtcgactcaatataaatatctgcagg          |
| <i>ins-35p::ins-35::venus</i> or <i>mrfp</i> | atagcatgctttcacgtaccttaaggaag                               | tatggatccaattgaatagttcatctgagtc        |
| <i>ins-35p::venus</i>                        | atagcatgctttcacgtaccttaaggaag                               | tatggatcctgctggaaaattagacaatttc        |
| <i>ges-1p::mrfp</i> or <i>venus</i>          | attgcatgcagaccatacggaaatagctgttag                           | aatccccgggctgaattcaaagataagatagtaataag |
| <i>osm-6p::ins-35</i>                        | <i>osm-6 region</i> atcgataagctgattaacgggctgatcgaacag       | gaatattgcttcatagatgtataactaatgaagg     |
|                                              | <i>ins-35 region</i> atgaagcaaatattcttgtaactctgctg          | ctgcaggaattcgatcaatataaatatctgcagg     |
| <i>ges-1p::ins-35</i>                        | <i>ges-1 region</i> atcgataagctgattaccaataacttttagtgacgat   | ctgaattcaaagataagatagtaataagattttgaagc |
|                                              | <i>ins-35 region</i> tatctttgaattcagatgaagcaaatattcttgtaaat | ctgcaggaattcgatcaatataaatatctgcagg     |
| <i>myo-3p::ins-35</i>                        | <i>myo-3 region</i> atcgataagctgctgctataataagttcttgaat      | gaatattgcttcaattctagatggctgatgtgctg    |
|                                              | <i>ins-35 region</i> atgaagcaaatattcttgtaactctgctg          | ctgcaggaattcgatcaatataaatatctgcagg     |
| deletion of intron in <i>ins-35</i>          | ATTCTCATGGAAGGATGTGGCTC                                     | CTTTTCATAGTTCTGACATATTGCTC             |
| <i>daf-28p::daf-28::venus</i>                | actgcatgcatgcttatcaatagcggatatacg                           | tatggatccacaagaagcaaacctggggcaac       |
| <i>ins-7p::ins-7::mrfp</i>                   | taagcttctcgaaggataacccccgaag                                | tggatccaaggacagcactgttttcg             |
| <i>ins-7p::ins-7</i>                         | attGTCGACagttacaccaatgcctattc                               | ttaCTGACGacatagcgcgagatcagtttg         |
| <i>sel-1</i>                                 | accgatatcATGATTAACCTATCTGACACTG                             | accgatatcAGGGCTTGGTGGTTGTTCTA          |
| <i>C02G6.1p::venus</i>                       | gttGCATGCTtgagtgacagacagtagcagc                             | ctaCCCGGGcattttcaccaaaaaatagtgctc      |
| <i>C02G6.2p::venus</i>                       | gttGCATGCTtgctgcccagaagcagtg                                | ctaCCCGGGcatttttagcagaaaactagactcggtg  |
| <i>C28F5.4p::venus</i>                       | gttGCATGCTgagataaccgacatgcttctg                             | ctaCCCGGGcattcaggataaaaactcgacaatc     |
| <i>F44E7.4p::venus</i>                       | caagcatgctgaaaacattgccacacttc                               | ctaCCCGGGcattcattgctctgtaaatc          |
| <i>Y70C5C.1p::venus</i>                      | gttGCATGCTatattttccagccattgttc                              | ctaCCCGGGcatttttagaagagaggttaaatctttg  |
| <i>ins-20</i> RNAi                           | tggacaaaccatcctactctg                                       | tcattctggacagcaccgtt                   |
| <i>ins-21</i> RNAi                           | gaaaaccactactcattttctg                                      | cgggacagcaaatgtacttg                   |
| <i>ins-22</i> RNAi                           | atgcacactacaactattctc                                       | tcattggtatcacagcacat                   |
| <i>ins-23</i> RNAi                           | gttcgttcttctattattctc                                       | tcactgagaagttggacag                    |
| <i>ins-24</i> RNAi                           | gagatctcccactgtttc                                          | tagaaaacgaagccagatgg                   |
| <i>ins-25</i> RNAi                           | gggcaacacatattctcag                                         | cagtttctgaagccaaac                     |
| <i>ins-26</i> RNAi                           | agagctctcgtcgtctattct                                       | gtgaatgaatagcttcatggt                  |
| <i>ins-27</i> RNAi                           | cttcgcttaactctgctct                                         | gatgagaaagttgggtctc                    |
| <i>ins-28</i> RNAi                           | atgatgcgctcattctttgt                                        | agattggacagcacatttca                   |
| <i>ins-29</i> RNAi                           | gttctgtaaatgttattgggtg                                      | caagcaagattgaaggacag                   |
| <i>ins-30</i> RNAi                           | tgagttctcacgccctggt                                         | cagaagacgaaatgggtctg                   |
| <i>ins-31</i> RNAi                           | gaagatgcccttgatcttgc                                        | aggcttatgctgtgtgcaga                   |
| <i>ins-32</i> RNAi                           | tcgattctgtgatccttcta                                        | atcagggcacattattgattg                  |
| <i>ins-33</i> RNAi                           | cctgcttaactcctctctg                                         | atcctcctttggacagcaac                   |
| <i>ins-34</i> RNAi                           | tgcaaatcgggtccatcgtg                                        | ttgctcattggtggacgac                    |
| <i>ins-35</i> RNAi                           | gaagcaaatattcttgtaatc                                       | gaatagttcatctgagtcac                   |
| <i>ins-36</i> RNAi                           | atgaacataggcaaatgttcc                                       | ttgaacctgcatttgggacag                  |
| <i>asna-1</i> RNAi                           | atgtcggatcagctggaagcctcta                                   | tagcttcaggatccaccatccgttc              |
